# Supplementary material
Source: HighWire-hosted journal article supplement (https://ijgc.bmj.com/content/ijgc-2020-001506)
Supplement: inline-supplementary-material-1 [file inline-supplementary-material-1.pdf]

## Supplementary appendix

### Protective Maneuvers Improve the Surgical Outcome in Cervical Cancer

#### Index:

1. List of participating European Countries and Institutions
2. Participation by Countries
3. List of inclusion and exclusion criteria
4. List of exclusions
5. Characteristics of patients
6. Open Surgery vs Minimally Invasive Surgery. Inverse probability weighting by propensity scores.
7. Open Surgery vs MIS with uterine manipulator and vs MIS without uterine manipulator. Inverse probability weighting by propensity scores.
8. Protective maneuvers. Sensitivity analysis
9. Protocol
10. Appendix 1. Countries of the ESGO area are allowed to participate in this study)
11. Appendix 2. SUCCOR STUDY application form
12. Appendix 3. Data Questionnaire (CRF)
13. Appendix 4. Succor study Final Declaration Form



## 1. List of participating European Countries and Institutions

| Country        | Name of your institution/hospital/cancer center                                           |
|----------------|-------------------------------------------------------------------------------------------|
| Armenia        | NAIRI Medical Center.                                                                     |
| Austria        | Medical University of Graz                                                                |
| Azerbaijan     | National Centre of Oncology                                                               |
| Belgium        | Cliniques de l'europe, ucl st luc UNGO                                                    |
| Belgium        | University Hospitals Leuven                                                               |
| Belgium        | CHU Liège, Site Notre Dame Bruyères                                                       |
| Belgium        | Cliniques universitaire Saint-Luc - UNGO                                                  |
| Bulgaria       | University hospital of the active treatment of Oncology                                   |
| Bulgaria       | Military Medical Academy                                                                  |
| Croatia        | Department of Obstetrics & Gynecology, Clinical Hospital Center Rijeka                    |
| Croatia        | University hospital Zagreb                                                                |
| Czech Republic | General faculty hospital                                                                  |
| Czech Republic | University Hospital Hradec Králové                                                        |
| Estonia        | East Tallin Central Hospital                                                              |
| Estonia        | North Estonia Medical Foundation                                                          |
| Estonia        | University Hospital                                                                       |
| Finland        | University Hospital of Tampere                                                            |
| France         | Centre Oscar Lambret                                                                      |
| France         | Institu Curie                                                                             |
| France         | Institut Bergonié                                                                         |
| France         | Georges Pompidou European Hospital                                                        |
| France         | Institut Universitaire du Cancer Toulouse Oncopole                                        |
| Germany        | Asklepios Klinik Hamburg Barmbek, Nord Heidberg and Wandsbek                              |
| Germany        | Kliniken Essen Mitte                                                                      |
| Germany        | Klinikum Dortmund gGmbH                                                                   |
| Germany        | Sana Klinikum Lichtenberg                                                                 |
| Germany        | Klinikum Nürnberg Nord obstetrics                                                         |
| Germany        | University Hospital of Cologne, Departement of Obstetrics & Gynecology                    |
| Greece         | Alexandra Hospital, 1st Department of Obstetris and Gynecology, Gynecologic Oncology Unit |
| Greece         | St. Luke's Hospital, Department of Gynecology oncology                                    |
| Greece         | Metaxa Memorial Cancer Hospital                                                           |
| Greece         | Papageorgiou General Hospital                                                             |
| Greece         | 2nd Department of Obstetrics and Gynaecology, Aristotle University of Thessaloniki        |
| Greece         | 3d Dept of Obstet/Gynecol (Aristotle University of Thessaloniki - Greece)                 |
| Hungary        | Unit.Gynecol.Oncol., Dept.ObGyn, Faculty of Medicine, University of Debrecen              |
| Hungary        | national Institute of Oncology                                                            |
| Italy          | Fondazione Policlinico A. Gemelli                                                         |
| Italy          | San Gerardo Hospital, University of Milan-Bicocca                                         |
| Italy          | EUROPEAN INSTITUTE OF ONCOLOGY                                                            |
| Italy          | University of Insubria                                                                    |
| Italy          | Fondazione IRCCS Istituto Nazionale Tumori - Milan                                        |
| Italy          | Endoscopica Malzoni, Center for Advanced Endoscopic Gynecologic Surgery                   |
| Italy          | Mauriziano Hospital                                                                       |
| Italy          | S. Orsola Hospital                                                                        |

|             |                                                                                    |
|-------------|------------------------------------------------------------------------------------|
| Italy       | Ospedale Santa Chiara                                                              |
| Italy       | "Regina Elena" National Cancer Institute                                           |
| Kazakhstan  | Kazakh Institute of Oncology and Radiology                                         |
| Macedonia   | Clinical Hospital, "Acibadem Sistina", Department of Ob/Gyn                        |
| Macedonia   | University Clinic for Obstetrics and Gynecology, Clinical Center Skopje            |
| Moldova     | Institute of Oncology                                                              |
| Netherlands | Dutch cancer institute AVI/NKI                                                     |
| Netherlands | Leiden University Medical Center                                                   |
| Netherlands | Radboudumc                                                                         |
| Netherlands | Amsterdam University Medical Center                                                |
| Poland      | Holycross cancer Center                                                            |
| Poland      | Jagiellonian University Medical College                                            |
| Poland      | Lower Silesian Oncology Center and Wroclaw Medical University                      |
| Poland      | Department of Gynaecology, Oncol. Gyn. & Endoc. Gyn. MU of Gdansk                  |
| Portugal    | Hospital Beatriz Ângelo                                                            |
| Portugal    | Chua-HDF                                                                           |
| Portugal    | Hospital Prof. Doutor Fernando Fonseca                                             |
| Portugal    | Centro Hospitalar Universitário de Coimbra                                         |
| Portugal    | Instituto Português de Oncologia de Lisboa Francisco Gentil                        |
| Portugal    | Instituto Português de Oncologia Centro do Porto                                   |
| Portugal    | Instituto Português de Oncologia de Coimbra                                        |
| Romania     | University of Medicine and Pharmacy "Victor Babes"                                 |
| Romania     | Emergency County Hospital Of Tîrgu Mureş - First Obstetrics and Gynecology Clinic  |
| Romania     | "Prof. Dr. Ion Chiricuta" Institute of Oncology                                    |
| Russia      | N.N.Petrov National Medical Research Center of Oncology,                           |
| Serbia      | Clinic of gynecology and obstetrics, Clinical center Serbia                        |
| Serbia      | Oncology Institute of Vojvodina                                                    |
| Slovakia    | II. dpt. of Gynaecology and Obstetrics, University hospital Bratislava             |
| Slovenia    | UNIVERSITY MEDICAL CENTRE LJUBLJANA                                                |
| Slovenia    | Department for gynecologic and breast oncology, University Medical Center, Maribor |
| Spain       | Hospital Universitari de Bellvitge                                                 |
| Spain       | Hospital Universitario Nuestra Señora de Candelaria                                |
| Spain       | Complejo Hospitalario de Navarra                                                   |
| Spain       | Hospital Clinico San Carlos                                                        |
| Spain       | Hospital Universitario Cruces                                                      |
| Spain       | CLINICA UNIVERSIDAD DE NAVARRA                                                     |
| Spain       | Clínica Universidad de Navarra                                                     |
| Spain       | Hospital Universitario 12 de Octubre                                               |
| Spain       | HOSPITAL UNIVERSITARIO DONOSTIA                                                    |
| Spain       | FUNDACION JIMENEZ DIAZ UNIVERSITY HOSPITAL                                         |
| Spain       | Hospital General universitario de Castellon                                        |
| Spain       | Hospital Universitario de Getafe                                                   |
| Spain       | Hospital Clínico Universitario "Lozano Blesa"                                      |
| Spain       | Hospital del Mar                                                                   |
| Spain       | Hospital Universitario Central de Asturias HUCA                                    |
| Spain       | University Hospital La fe                                                          |
| Spain       | Hospital Universitario Virgen Macarena                                             |
| Spain       | HOSPITAL GENERAL UNIVERSITARIO VALENCIA                                            |
| Spain       | INSTITUTO VALENCIANO ONCOLOGIA                                                     |
| Spain       | La Paz University Hospital                                                         |
| Spain       | INFANTA LEONOR UNIVERSITY HOSPITAL                                                 |



|                |                                                                                                                   |
|----------------|-------------------------------------------------------------------------------------------------------------------|
| Spain          | Hospital Universitario Materno Infantil de Canarias                                                               |
| Spain          | HOSPITAL PUERTA DE HIERRO MAJADAHONDA                                                                             |
| Spain          | Hospital Universitario Quironsalud Madrid                                                                         |
| Spain          | HOSPITAL UNIVERSITARIO DE LA RIBERA                                                                               |
| Spain          | Hospital Universitario Ramón y Cajal                                                                              |
| Spain          | HOSPITAL UNIVERSITARI SANT JOAN DE REUS                                                                           |
| Spain          | Corporació Sanitària Parc Taulí                                                                                   |
| Spain          | HOSPITAL UNIVERSITARIO TORRECARDENAS                                                                              |
| Spain          | Dr. Josep Trueta University Hospital                                                                              |
| Spain          | HUA Txagorritxu                                                                                                   |
| Spain          | Hospital Universitario Marqués de Valdecilla                                                                      |
| Spain          | Hospital Álvaro Cunqueiro                                                                                         |
| Switzerland    | Kantonsspital Frauenfeld, Frauenklinik                                                                            |
| Switzerland    | Hôpitaux Universitaires de Genève                                                                                 |
| Switzerland    | Frauenklinik Luzerner Kantonsspital                                                                               |
| Turkey         | Zekai Tahir Burak Women's Health Training Hospital                                                                |
| Turkey         | Istanbul University-Cerrahpasa Cerrahpasa Medical Faculty, Department of OB&GYN, Division of Gynecologic Oncology |
| Turkey         | Etlik Zübeyde Hanım Women's Health Training and Research Hospital                                                 |
| Turkey         | Istanbul Kanuni Sultan Süleyman Education & Research Hospital                                                     |
| Turkey         | Sağlık Bilimleri University Antalya Research and Training Hospital                                                |
| Turkey         | Yüzüncü Yıl University, Medical school, Department of Gynecologic Oncology                                        |
| Ukraine        | LISOD - Israeli Oncological Hospital                                                                              |
| Ukraine        | Lviv state regional oncology center                                                                               |
| United Kingdom | Cheltenham General Hospital                                                                                       |
| United Kingdom | University Hospitals of Leicester                                                                                 |
| United Kingdom | Portsmouth Hospital NHS Trust                                                                                     |
| United Kingdom | University College London Hospital (UCLH)                                                                         |
| United Kingdom | The Christie NHS FT                                                                                               |
| United Kingdom | Northern Gynaecological Oncology Centre                                                                           |
| United Kingdom | Royal Cornwall Hospital                                                                                           |
|                |                                                                                                                   |

## 2.Participation by Countries

|                | N    | Percent |
|----------------|------|---------|
| Italy          | 188  | 16,3    |
| Spain          | 171  | 14,8    |
| United Kingdom | 76   | 6,6     |
| Turkey         | 65   | 5,6     |
| Portugal       | 61   | 5,3     |
| Netherlands    | 55   | 4,8     |
| Greece         | 53   | 4,6     |
| France         | 50   | 4,3     |
| Romania        | 48   | 4,2     |
| Ukraine        | 43   | 3,7     |
| Poland         | 34   | 2,9     |
| Belgium        | 33   | 2,9     |
| Croatia        | 30   | 2,6     |
| Germany        | 27   | 2,3     |
| Bulgaria       | 26   | 2,2     |
| Hungary        | 26   | 2,2     |
| Czech Republic | 22   | 1,9     |
| Estonia        | 21   | 1,8     |
| Macedonia      | 21   | 1,8     |
| Azerbaijan     | 20   | 1,7     |
| Kazakhstan     | 19   | 1,6     |
| Austria        | 13   | 1,1     |
| Finland        | 13   | 1,1     |
| Russia         | 13   | 1,1     |
| Serbia         | 8    | ,7      |
| Slovenia       | 6    | ,5      |
| Switzerland    | 6    | ,5      |
| Armenia        | 5    | ,4      |
| Slovakia       | 3    | ,3      |
| Total          | 1156 | 100,0   |

### 3. List of inclusion and exclusion criteria

#### Inclusion Criteria

- A. Primary squamous cell carcinoma, adenocarcinoma, or adenosquamous carcinoma of the uterine cervix.
- B. FIGO IB1 carcinoma (FIGO 2009)
- C. Preoperative pelvic MRI indicating tumor diameter < 4 cm (at least two dimensions,) and no parametrial invasion. Exceptionally, it can be considered acceptable Vaginal Ultrasound, only if your Institution have internally validated this technique for cervical cancer. Otherwise, it cannot be accepted.
- D. Preoperative either (Abdominal) CT scan or MRI or PET-CT ruling out extracervical metastatic disease
- E. Performance status ECOG 0-1
- F. Age 18 years or older
- G. Type II-III radical hysterectomy or Type B-C by MIS (laparoscopic or robotic) or open surgery.
- H. Operated during the years 2013-2014 within the ESGO area.
- I. Bilateral pelvic lymphadenectomy or SNB plus bilateral pelvic lymphadenectomy. At least, a total of 10 pelvic nodes must be reported (considering both sides)
- J. Pathologic report shows information on tumor size, vaginal and parametrial margins and bilateral nodal status.

#### Exclusion Criteria

- A. Any histological type other than adenocarcinoma, squamous cell carcinoma or adenosquamous carcinoma of the uterine cervix
- B. Tumor size greater than 4 cm.
- C. Past medical history of any invasive tumor
- D. History of previous abdominal or pelvic radiotherapy of any type (including braquitherapy).
- E. History of preoperative neoadjuvant chemotherapy cervical cancer .
- F. Cervical conization previous to surgery.
- G. Suspicious positive pelvic or paraaortic nodes or metastatic disease on PET CT, MRI, or CT.
- H. Any uterine diameter larger than 12 cm
- I. Conversion from MIS to laparotomy
- J. Pregnant women.

**4.List of excluded patients**

116 patients were excluded

- 41 No Preoperative Imaging
- 40 Absence of follow- up data
- 24 Insufficient Lymph Node Dissection
- 13 Stage <IB1
- 13 Tumor Size >40 mm
- 12 No Radical Hysterectomy
- 8 Conversion to Laparotomy
- 3 Rare Histology
- 2 Preoperative Parametrial Invasion

**5.Characteristics of patients (No previous cone biopsy. Includes lost of follow-up)**

| Baseline Characteristics                | Open Surgery<br>(N = 436 ) | Minimally<br>Inv Surgery<br>(N = 297) | Sig     |
|-----------------------------------------|----------------------------|---------------------------------------|---------|
| Age — yr                                | 48.4 ± 10.6                | 47.8 ± 11.5                           | 0.508   |
| Body-mass index — kg/m <sup>2</sup>     | 26.0 ± 4.6                 | 25.4 ± 5.6                            | 0.171   |
| Caucasian Race (%)                      | 354 (89)                   | 247 (94)                              | < 0.001 |
| ECOG performance-status score 0 (%)     | 377 (89.3)                 | 260 (92.9)                            | 0.161   |
| Smoker >10 cig day (%)                  | 90 (28.8)                  | 64 (26.8)                             | 0.584   |
| Clinical tumor size — mm                | 24.1 ± 9.7                 | 21.1 ± 10.3                           | < 0.001 |
| MRI largest diameter — mm               | 25.7 ± 10.1                | 21.5 ± 10.1                           | < 0.001 |
| MRI-US largest diameter — mm            | 24.8 ± 10.8                | 20.6 ± 11.2                           | < 0.001 |
| Type C Rad Hysterectomy (%)             | 343 (80.6)                 | 192 (69.6)                            | < 0.001 |
| Surgery performed by Senior surgeon (%) | 361 (83.2)                 | 218 (75.7)                            | < 0.001 |
| Nerve sparing technique (%)             | 131 (38.6)                 | 208 (84.6)                            | < 0.001 |
| Sentinel Lymph Node Biopsy (%)          | 52 (12.9)                  | 107 (38.6)                            | < 0.001 |
| Duration of procedure — min             | 196.2 ± 55.6               | 243.3 ± 75.8                          | < 0.001 |
| Estimated blood loss — cc               | 400.0 ± 373.1              | 187 ± 206.1                           | < 0.001 |

|                                                     |             |             |                   |
|-----------------------------------------------------|-------------|-------------|-------------------|
| Intraoperative complications any grade (%)          | 42 (9.8)    | 26 (9.1)    | 0.759             |
| Histology in the specimen (%)                       |             |             |                   |
| Squamous                                            | 311 (71.6)  | 181 (61.6)  | <b>0.007</b>      |
| Adenocarcinoma                                      | 104 (24.0)  | 102 (34.7)  |                   |
| Adenosquamous                                       | 19 (4.4)    | 11 (3.7)    |                   |
| Tumor Largest diameter in Path. Report (mm)         | 23.8 ± 10.0 | 22.5 ± 9.5  | 0.075             |
| Tumor Largest lateral diameter in Path. Report (mm) | 24.3 ± 9.0  | 22.8 ± 9.1  | <b>0.029</b>      |
| Largest ant-post diameter in Path. Report (mm)      | 20.0 ± 8.8  | 17.1 ± 7.8  | <b>&lt; 0.001</b> |
| Depth of invasion (mm)                              | 13.4 ± 7.8  | 10.6 ± 6.7  | <b>&lt; 0.001</b> |
| Uninvolved stroma (mm)                              | 7.4 ± 5.7   | 7.6 ± 5.2   | 0.758             |
| Final tumor grade III (%)                           | 129 (32.4)  | 102 (37.1)  | 0.421             |
| Lymphovascular Space Invasion (%)                   | 138 (37.3)  | 69 (32.7)   | 0.082             |
| Tumor invades >2/3 of the stroma (%)                | 138 (37.6)  | 69 (32.7)   | 0.204             |
| Parametrial invasion (%)                            | 16 (3.7)    | 16 (5.6)    | 0.232             |
| Vaginal infiltration (%)                            | 15 (3.5)    | 10 (3.5)    | 0.991             |
| Positive Margins (%)                                | 47 (10.9)   | 23 (7.8)    | 0.174             |
| Sentinel lymph node biopsy (%)                      | 52 (12.90)  | 107 (38.6)  | <b>&lt; 0.001</b> |
| Mean Retrieved pelvic nodes — N                     | 25.8 ± 14.4 | 22.2 ± 12.1 | <b>&lt; 0.001</b> |
| Mean positive pelvic nodes — N                      | 1.8 ± 0.2   | 1.0 ± 0.1   | <b>0.044</b>      |
| Positive pelvic nodes (%)                           | 74 (17.1)   | 37 (12.60)  | 0.100             |
| Figo Staging 2018                                   |             |             |                   |
| IB1 ≥5 mm and <2 cm (%)                             | 135 (31.1)  | 118 (40.19) | 0.041             |
| IB2 ≥2 cm and ≤4 cm (%)                             | 214 (49 %)  | 128 (43.5)  |                   |
| Mean length of stay — Days                          | 8.9 ± 4.3   | 5.14 ± 3.4  | <b>&lt; 0.001</b> |
| Any Postoperative complications (%)                 | 99 (23 %)   | 57 (20)     | 0.338             |
| Readmission (%)                                     | 10 (2.3)    | 7 (2.4)     | 0.947             |

|                                                   |              |               |              |
|---------------------------------------------------|--------------|---------------|--------------|
| Adjuvant therapy after surgery (%)                | 247 (58.3)   | 138 (47.1)    | <b>0.003</b> |
| Mean size of tumor receiving adjuvant therapy —mm | 25.9 ± 9.7   | 26.1 ± 9.1    | 0.843        |
| Median time to radiation (days)                   | 61.7 ± 93.0  | 57.7 ± 23.8   | 0.681        |
| Median Follow up —months (Range)                  | 57 (0 to 83) | 59 (0 to 79). | 0.053        |

## 6. Open Surgery vs Minimally Invasive Surgery

- Excluded 423 participants with previous conization.
- 34 participants excluded with missing information on relapse.
- 1 participant excluded with missing information on follow-up time.
- New category for missing values except for ADJUVANTCODE because participants with missing value in that variable were dropped out from the Cox regression model (N=5).
- PS covariates: MAXPATHCODE, Finalgrade, finalLVSlcode, finalDepthcode, MARGINCODE, codeN, ADJUVANTCODE.
- AUC of the PS: 0.81
- Clustered analyses by center (119 centers).
- N=693

### DISEASE FREE SURVIVAL

|             | Open surgery | Minimally Invasive Surgery |
|-------------|--------------|----------------------------|
| Relapse no  | 355          | 231                        |
| Relapse yes | 47           | 60                         |
| total       | 402          | 291                        |

#### MAXPATHCODE=1

|             | Open surgery | Minimally Invasive Surgery |
|-------------|--------------|----------------------------|
| Relapse no  | 145          | 111                        |
| Relapse yes | 15           | 17                         |
| Total       | 160          | 128                        |

#### MAXPATHCODE=2

|             | Open surgery | Minimally Invasive Surgery |
|-------------|--------------|----------------------------|
| Relapse no  | 210          | 120                        |
| Relapse yes | 32           | 43                         |
| total       | 242          | 163                        |

**Inverse probability weighting-adjusted disease-free survival by type of intervention.**

|           | Open surgery | Minimally Invasive Surgery |
|-----------|--------------|----------------------------|
| 12 months | 0.97         | 0.92                       |
| 24 months | 0.94         | 0.87                       |
| 54 months | 0.89         | 0.79                       |

**Hazard Ratios and 95% Confidence Intervals for the risk of relapse by type of intervention. Adjusted using Inverse probability weighting by propensity scores.**

|                              | Open surgery | Minimally Invasive Surgery |
|------------------------------|--------------|----------------------------|
| Incident cases               | 47           | 60                         |
| Time at risk (person/months) | 21651,3      | 13739,8                    |
| HR (95% CI)                  | 1.00 (Ref)   | 2.07 (1.35–3.15)           |
| p value                      |              | 0.001                      |
| <b>Subgroups analysis:</b>   |              |                            |
| MAXPATHCODE 1                | 1.00 (Ref)   | 1.63 (0.79-3.40)           |
|                              |              | p = 0.19                   |
| MAXPATHCODE 2                | 1.00 (Ref)   | 2.31 (1.37-3.90)           |
|                              |              | p = 0.002                  |

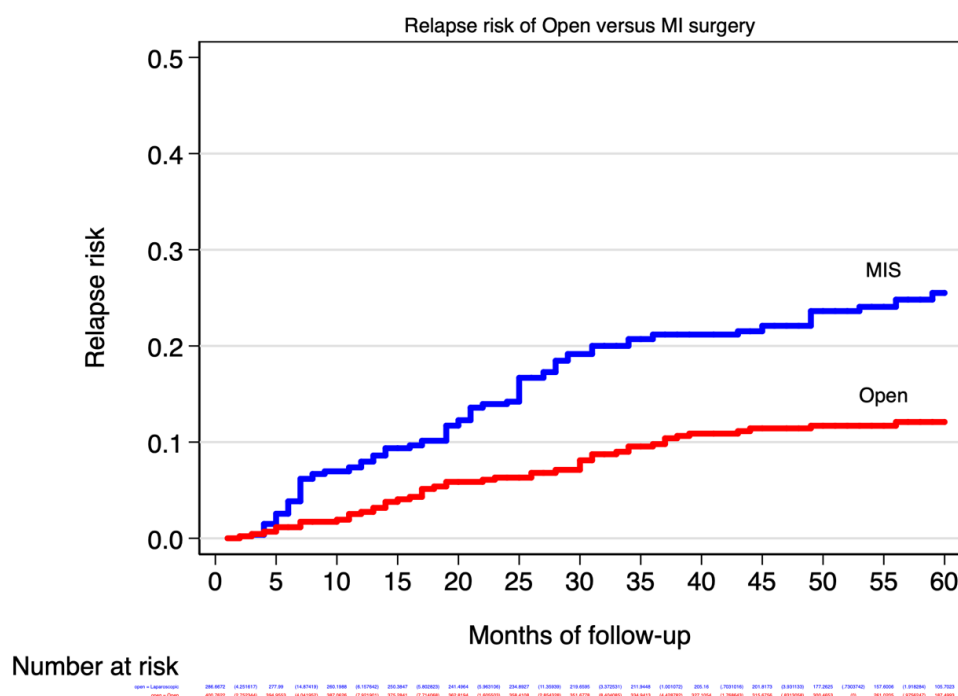**Log-Rank test: p=0.0003**

**OVERALL SURVIVAL**

|           | Open surgery | Minimally Invasive Surgery |
|-----------|--------------|----------------------------|
| Death no  | 381          | 263                        |
| Death yes | 21           | 28                         |
| total     | 402          | 291                        |

**MAXPATHCODE=1**

|           | Open surgery | Minimally Invasive Surgery |
|-----------|--------------|----------------------------|
| Death no  | 155          | 120                        |
| Death yes | 5            | 8                          |
| total     | 160          | 128                        |

**MAXPATHCODE=2**

|           | Open surgery | Minimally Invasive Surgery |
|-----------|--------------|----------------------------|
| Death no  | 226          | 143                        |
| Death yes | 16           | 20                         |
| total     | 242          | 163                        |

**Inverse probability weighting-adjusted overall survival by type of intervention.**

|           | Open surgery | Minimally Invasive Surgery |
|-----------|--------------|----------------------------|
| 12 months | 1.00         | 0.99                       |
| 24 months | 0.99         | 0.96                       |
| 54 months | 0.97         | 0.89                       |

**Hazard Ratios and 95% Confidence Intervals for the overall survival by type of intervention. Adjusted using Inverse probability weighting by propensity scores.**

|                              | Open surgery | Minimally Invasive Surgery |
|------------------------------|--------------|----------------------------|
| Incident cases               | 21           | 28                         |
| Time at risk (person/months) | 22805,9      | 15133,5                    |
| HR (95% CI)                  | 1.00 (Ref)   | 2.42 (1.34–4.39)           |
| p value                      |              | 0.004                      |
| Subgroups analysis:          |              |                            |
| MAXPATHCODE 1                | 1.00 (Ref)   | 2.77 (0.91-8.47)           |
|                              |              | p = 0.072                  |
| MAXPATHCODE 2                | 1.00 (Ref)   | 2.26 (1.18-4.36)           |
|                              |              | p = 0.014                  |



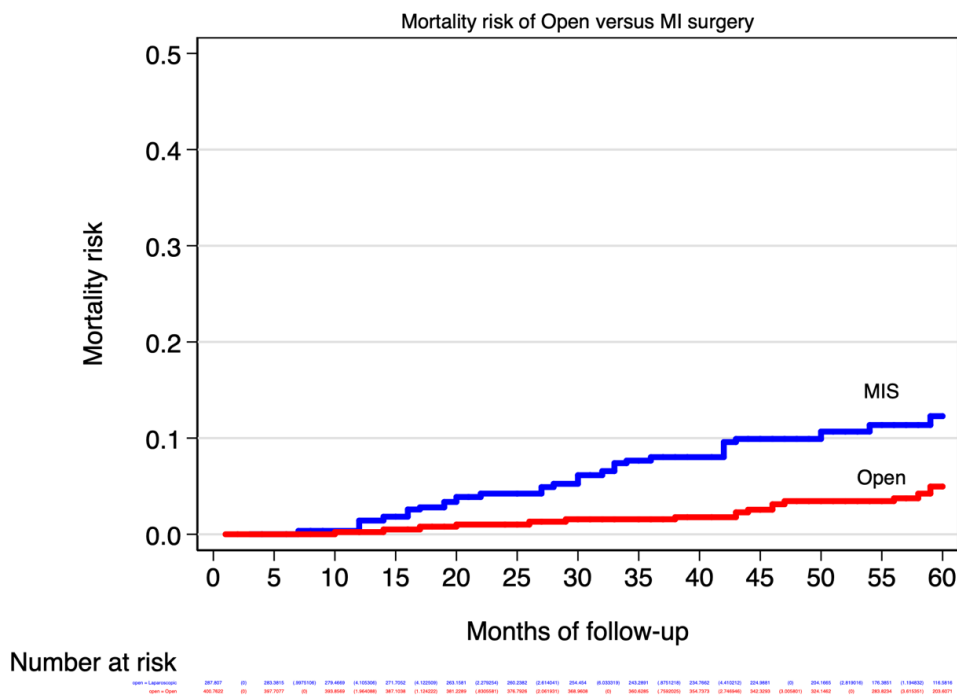

Log-Rank test: p=0.003

## 7. Open Surgery vs MIS with uterine manipulator and vs MIS without uterine manipulator

- Excluded 423 participants with previous conization.
- 34 participants excluded with missing information on relapse.
- 1 participant excluded with missing information on follow-up time.
- New category for missing values except for ADJUVANTCODE because participants with missing value in that variable were dropped out from the Cox regression model (N=5).
- PS covariates: MAXPATHCODE, Finalgrade, finalLVScode, finalDepthcode, MARGINCODE, codeN, ADJUVANTCODE.
- AUC of the PS: 1.00
- Clustered analyses by center (119 centers).
- 41 excluded with missing values for uterine manipulator
- N=652

### DISEASE FREE SURVIVAL

|             | Open surgery | Minimally Invasive Surgery   |                           |
|-------------|--------------|------------------------------|---------------------------|
|             |              | Without uterine manipulation | With uterine manipulation |
| Relapse no  | 355          | 89                           | 106                       |
| Relapse yes | 47           | 17                           | 38                        |
| total       | 402          | 106                          | 144                       |

### Inverse probability weighting-adjusted disease-free survival by type of intervention.

|           | Open surgery | Minimally Invasive Surgery   |                           |
|-----------|--------------|------------------------------|---------------------------|
|           |              | Without uterine manipulation | With uterine manipulation |
| 12 months | 0.97         | 0.90                         | 0.90                      |
| 24 months | 0.94         | 0.86                         | 0.83                      |
| 54 months | 0.89         | 0.83                         | 0.73                      |

### MAXPATHCODE=1

|             | Open surgery | Minimally Invasive Surgery   |                           |
|-------------|--------------|------------------------------|---------------------------|
|             |              | Without uterine manipulation | With uterine manipulation |
| Relapse no  | 145          | 35                           | 56                        |
| Relapse yes | 15           | 4                            | 11                        |
| Total       | 160          | 39                           | 67                        |

| MAXPATCODE  | Open surgery | Minimally Invasive Surgery   |                           |
|-------------|--------------|------------------------------|---------------------------|
|             |              | Without uterine manipulation | With uterine manipulation |
| Relapse no  | 210          | 54                           | 50                        |
| Relapse yes | 32           | 13                           | 27                        |
| Total       | 242          | 67                           | 77                        |

| Intervention: Adjusted using inverse probability weighting by propensity scores. |              |                              |                           |
|----------------------------------------------------------------------------------|--------------|------------------------------|---------------------------|
|                                                                                  | Open surgery | Minimally Invasive Surgery   |                           |
|                                                                                  |              | Without uterine manipulation | With uterine manipulation |
| Incident cases                                                                   | 47           | 17                           | 38                        |
| Time at risk (person/months)                                                     | 21664,1      | 4957,5                       | 6757,7                    |
| HR (95% CI)                                                                      | 1.00 (Ref)   | 1.58 (0.79–3.15)             | 2.76 (1.75–4.33)          |
| p value                                                                          |              | 0.20                         | <0.001                    |
| Subgroups analysis                                                               |              |                              |                           |
| MAXPATHCODE 1                                                                    | 1.00 (Ref)   | 0.99 (0.27-3.64)             | 2.25 (0.96-5.26)          |
|                                                                                  |              | p= 0.99                      | p=0.061                   |
| MAXPATHCODE 1                                                                    | 1.00 (Ref)   | 1.83 (0.80-4.18)             | 3.05 (1.73-5.38)          |
|                                                                                  |              | p=0.152                      | P<0.001                   |

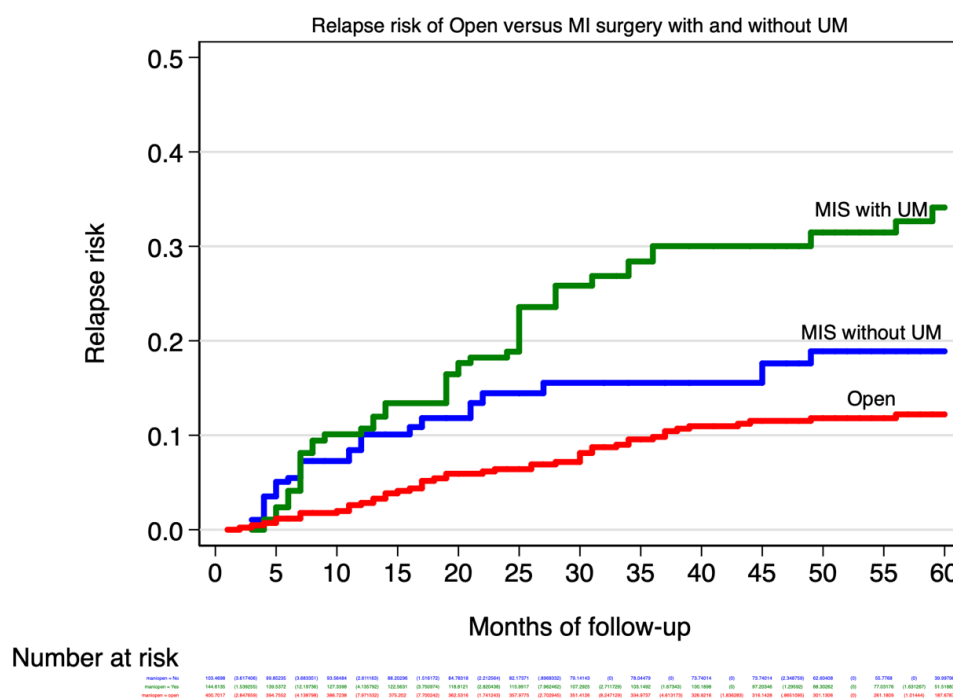

**OVERALL SURVIVAL**

|           | Open surgery | Minimally Invasive Surgery   |                           |
|-----------|--------------|------------------------------|---------------------------|
|           |              | Without uterine manipulation | With uterine manipulation |
| Death no  | 381          | 95                           | 128                       |
| Death yes | 21           | 11                           | 16                        |
| total     | 402          | 106                          | 144                       |

**Inverse probability weighting-adjusted overall survival by type of intervention.**

|           | Open surgery | Minimally Invasive Surgery   |                           |
|-----------|--------------|------------------------------|---------------------------|
|           |              | Without uterine manipulation | With uterine manipulation |
| 12 months | 1.00         | 1.00                         | 0.97                      |
| 24 months | 0.99         | 0.98                         | 0.92                      |
| 54 months | 0.97         | 0.91                         | 0.86                      |

**MAXPATHCODE=1**

|           | Open surgery | Minimally Invasive Surgery   |                           |
|-----------|--------------|------------------------------|---------------------------|
|           |              | Without uterine manipulation | With uterine manipulation |
| Death no  | 155          | 36                           | 62                        |
| Death yes | 5            | 3                            | 5                         |
| Total     | 160          | 39                           | 67                        |

**MAXPATHCODE=2**

|           | Open surgery | Minimally Invasive Surgery   |                           |
|-----------|--------------|------------------------------|---------------------------|
|           |              | Without uterine manipulation | With uterine manipulation |
| Death no  | 226          | 59                           | 66                        |
| Death yes | 16           | 8                            | 11                        |
| Total     | 242          | 67                           | 77                        |

**Hazard Ratios and 95% Confidence Intervals for the overall survival by type of intervention. Adjusted using Inverse probability weighting by propensity scores.**

|                              | Open surgery | Minimally Invasive Surgery   |                           |
|------------------------------|--------------|------------------------------|---------------------------|
|                              |              | Without uterine manipulation | With uterine manipulation |
| Incident cases               | 21           | 11                           | 16                        |
| Time at risk (person/months) | 22817,8      | 5396,1                       | 7661,7                    |
| HR (95% CI)                  | 1.00 (Ref)   | 2.03 (0.92–4.48)             | 3.00 (1.60–5.62)          |
| p value                      |              | 0.078                        | 0.001                     |
| Subgroups analysis           |              |                              |                           |
| MAXPATHCODE 1                | 1.00 (Ref)   | 2.32 (0.54-10.07)            | 3.84 (1.11-13.26)         |
|                              |              | p= 0.26                      | p=0.033                   |
| MAXPATHCODE 1                | 1.00 (Ref)   | 1.89 (0.76-4.67)             | 2.69 (1.22-5.89)          |
|                              |              | p=0.173                      | p=0.013                   |

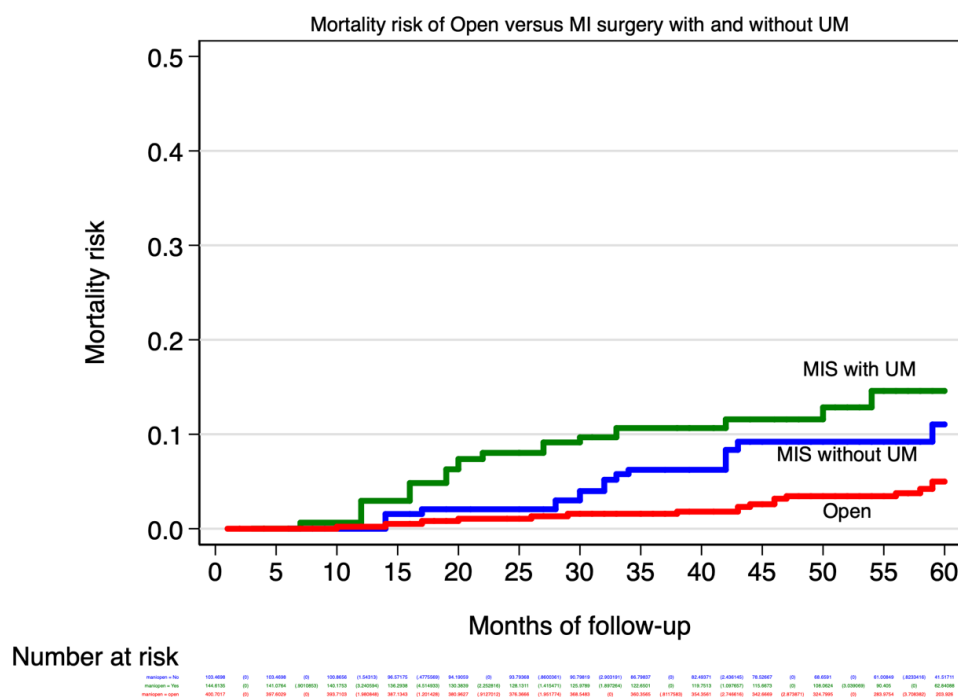

Log-Rank test: p=0.004

## 8. Open Surgery vs MIS with an without protective maneuvers

- Excluded 423 participants with previous conization.
- 34 participants excluded with missing information on relapse.
- 1 participant excluded with missing information on follow-up time.
- New category for missing values except for ADJUVANTCODE because participants with missing value in that variable were dropped out from the Cox regression model (N=5).
- PS covariates: MAXPATHCODE, Finalgrade, finalLVSIcode, finalDepthcode, MARGINCODE, codeN, ADJUVANTCODE.
- AUC of the PS: 1.00
- Clustered analyses by center (119 centers).
- 41 excluded with missing values for uterine manipulator
- N=652

### DISEASE FREE SURVIVAL

|             | Open surgery | Minimally Invasive Surgery   |                           |
|-------------|--------------|------------------------------|---------------------------|
|             |              | Without protective colpotomy | With protective colpotomy |
| Relapse no  | 355          | 155                          | 40                        |
| Relapse yes | 47           | 52                           | 3                         |
| total       | 402          | 207                          | 43                        |

### Inverse probability weighting-adjusted disease-free survival by type of intervention.

|           | Open surgery | Minimally Invasive Surgery   |                           |
|-----------|--------------|------------------------------|---------------------------|
|           |              | Without protective colpotomy | With protective colpotomy |
| 12 months | 0.97         | 0.89                         | 0.97                      |
| 24 months | 0.94         | 0.82                         | 0.95                      |
| 54 months | 0.89         | 0.74                         | 0.93                      |

### MAXPATHCODE=1

|             | Open surgery | Minimally Invasive Surgery   |                           |
|-------------|--------------|------------------------------|---------------------------|
|             |              | Without protective colpotomy | With protective colpotomy |
| Relapse no  | 145          | 75                           | 16                        |
| Relapse yes | 15           | 14                           | 1                         |
| Total       | 160          | 89                           | 17                        |

**MAXPATHCODE=2**

|             | Open surgery | Minimally Invasive Surgery   |                           |
|-------------|--------------|------------------------------|---------------------------|
|             |              | Without protective colpotomy | With protective colpotomy |
| Relapse no  | 210          | 80                           | 24                        |
| Relapse yes | 32           | 38                           | 2                         |
| Total       | 242          | 118                          | 26                        |

**Hazard Ratios and 95% Confidence Intervals for the risk of relapse by type of intervention. Adjusted using Inverse probability weighting by propensity scores.**

|                              | Open surgery | Minimally Invasive Surgery   |                           |
|------------------------------|--------------|------------------------------|---------------------------|
|                              |              | Without protective colpotomy | With protective colpotomy |
| Incident cases               | 47           | 52                           | 3                         |
| Time at risk (person/months) | 21792.0      | 9645.8                       | 2051.6                    |
| HR (95% CI)                  | 1.00 (Ref)   | 2.58 (1.70-3.95)             | 0.63 (0.15-2.59)          |
| p value                      |              | <0.001                       | 0.518                     |
| <b>Subgroups analysis</b>    |              |                              |                           |
| MAXPATHCODE 1                | 1.00 (Ref)   | 1.96 (0.91-4.27)             | 0.84 (0.10-7.25)          |
|                              |              | p=0.09                       | p=0.87                    |
| MAXPATHCODE 1                | 1.00 (Ref)   | 2.99 (1.78-5.00)             | 0.54 (0.18-1.61)          |
|                              |              | p<0.001                      | P=0.27                    |

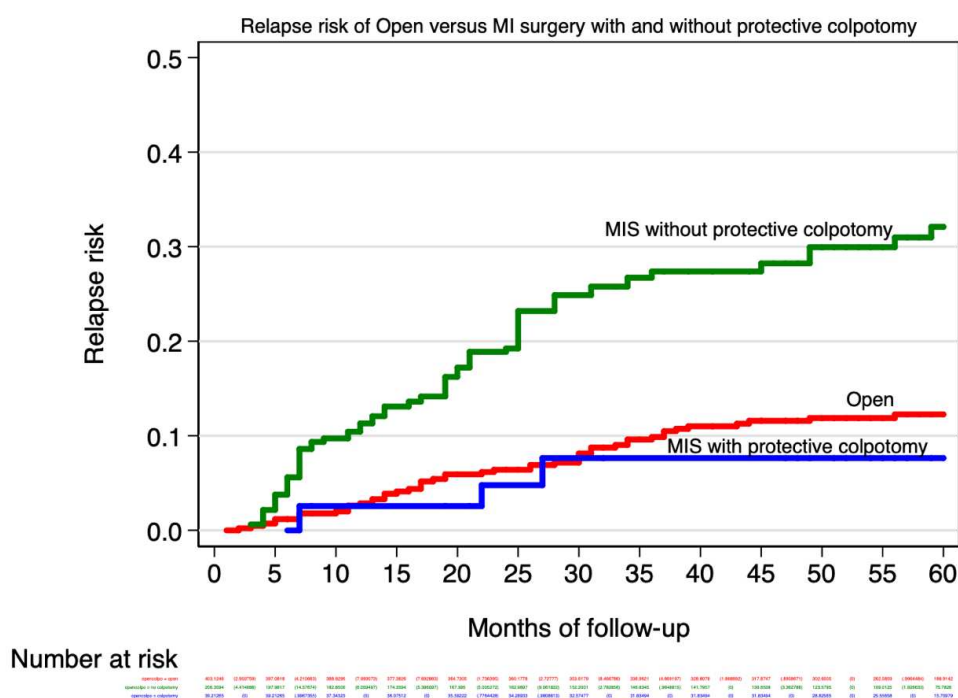

**Log-Rank test:  $p < 0.001$**

**OVERALL SURVIVAL**

|           | Open surgery | Minimally Invasive Surgery   |                           |
|-----------|--------------|------------------------------|---------------------------|
|           |              | Without protective colpotomy | With protective colpotomy |
| Death no  | 381          | 183                          | 40                        |
| Death yes | 21           | 24                           | 3                         |
| total     | 402          | 207                          | 43                        |

**Inverse probability weighting-adjusted overall survival by type of intervention.**

|           | Open surgery | Minimally Invasive Surgery   |                           |
|-----------|--------------|------------------------------|---------------------------|
|           |              | Without protective colpotomy | With protective colpotomy |
| 12 months | 1.00         | 0.98                         | 1.00                      |
| 24 months | 0.99         | 0.94                         | 1.00                      |
| 54 months | 0.97         | 0.87                         | 0.92                      |

**MAXPATHCODE=1**

|           | Open surgery | Minimally Invasive Surgery   |                           |
|-----------|--------------|------------------------------|---------------------------|
|           |              | Without protective colpotomy | With protective colpotomy |
| Death no  | 155          | 82                           | 16                        |
| Death yes | 5            | 7                            | 1                         |
| Total     | 160          | 89                           | 17                        |

**MAXPATHCODE=2**

|           | Open surgery | Minimally Invasive Surgery   |                           |
|-----------|--------------|------------------------------|---------------------------|
|           |              | Without protective colpotomy | With protective colpotomy |
| Death no  | 226          | 101                          | 24                        |
| Death yes | 16           | 17                           | 2                         |
| Total     | 242          | 118                          | 26                        |



**Hazard Ratios and 95% Confidence Intervals for the overall survival by type of intervention. Adjusted using Inverse probability weighting by propensity scores.**

|                              | Open surgery | Minimally Invasive Surgery   |                           |
|------------------------------|--------------|------------------------------|---------------------------|
|                              |              | Without protective colpotomy | With protective colpotomy |
| Incident cases               | 21           | 24                           | 3                         |
| Time at risk (person/months) | 22958.5      | 10928.7                      | 2094.1                    |
| HR (95% CI)                  | 1.00 (Ref)   | 2.85 (1.59–5.15)             | 1.59 (0.37–6.90)          |
| p value                      |              | p<0.001                      | 0.53                      |
| Subgroups analysis           |              |                              |                           |
| MAXPATHCODE 1                | 1.00 (Ref)   | 3.33 (1.06-10.46)            | 2.62 (0.3-22.83)          |
|                              |              | p= 0.039                     | p=0.384                   |
| MAXPATHCODE 1                | 1.00 (Ref)   | 2.71 (1.35-5.46)             | 1.24 (0.27-5.65)          |
|                              |              | p=0.005                      | p=0.776                   |

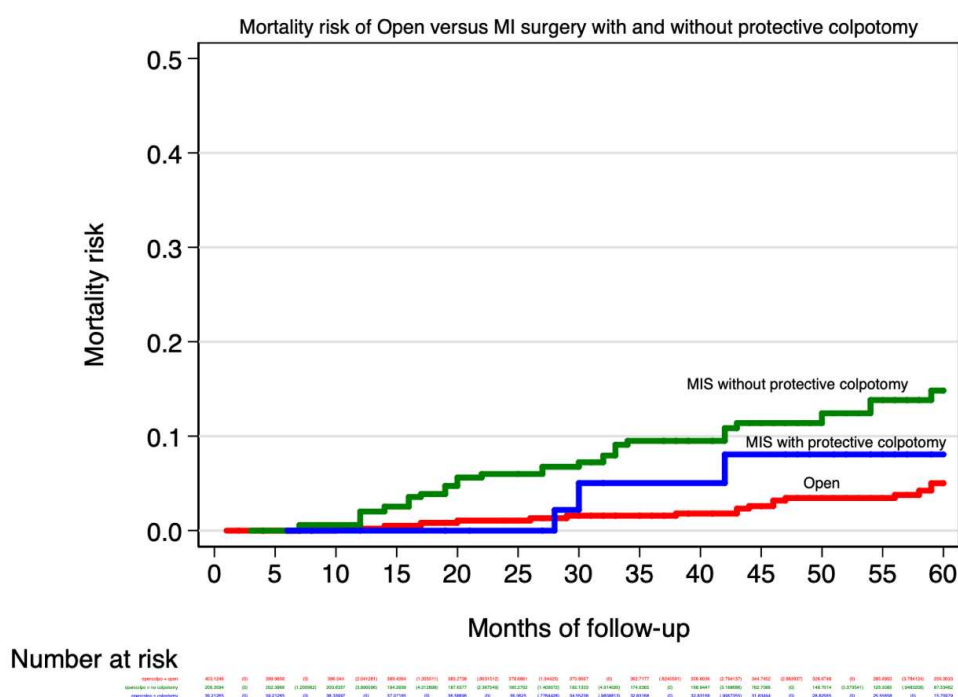

Log-Rank test: p=0.002

## 9. Protocol

---

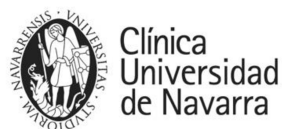

---

### Protocol Title

SUCCOR-Surgery in Cervical cancer

### Full Protocol Title

An international European retrospective cohort observational study comparing Laparoscopic or Robotic Radical Hysterectomy versus Abdominal Radical Hysterectomy in Patients with Early Stage Cervical Cancer

### Indication

Cervical Cancer FIGO Stage 1B1 (FIGO 2009)

### Study Chair:

Luis M. Chiva. MD, PhD.  
Director of Department of Obstetrics and Gynecology  
Clinica Universidad de Navarra  
UNIVERSIDAD DE NAVARRA  
[lchiva@unav.es](mailto:lchiva@unav.es)

### Co-Chairs

José A Minguez. MD, PhD.  
Department of Obstetrics and Gynecology  
Clinica Universidad de Navarra  
UNIVERSIDAD DE NAVARRA

Daniel Vazquez. MD, PhD.  
Department of Obstetrics and Gynecology  
Clinica Universidad de Navarra  
UNIVERSIDAD DE NAVARRA

### Study statistician

Juan Arevalo MD, PhD  
Department of Internal Medicine  
UNIVERSIDAD DE ALCALA DE HENARES

## Study design

---

International, multicenter, observational, retrospective, cohort study of consecutive cervical cancer cases operated in 2013 and 2014 within hospitals belonging to the ESGO area (50 countries) that meet the inclusion-exclusion criteria.

We plan to balance both groups by means of a Propensity Score Matched Cohort Study for the following variables: histology, tumor diameter, tumor volume (MRI and pathology), depth of invasion, LVSI, parametrial invasion, vaginal margins, positive nodes, grade and adjuvant radiation.

## Primary endpoint

---

Compare disease-free survival at 4.5 years in patients who underwent a laparoscopic or robotic radical hysterectomy (MIS) vs. abdominal radical hysterectomy (TARH) for stage IB1 cervical cancer.

## Secondary endpoints

---

Compare overall survival at 4.5 years between groups.

Compare patterns of recurrence between groups.

Compare treatment-associated morbidity (30 days after surgery )

Define association between tumor diameter, tumor volume (by MRI and pathology) with rates of relapse in both groups.

Stablish groups of low and high risk of relapse in both groups.

Explore causal association between specific surgical maneuvers and chance of relapse (Manipulator, vaginal closure, nodes extraction)

## Definitions

---

Disease-free survival is defined as the time from Radical Hysterectomy to disease recurrence or death from cervical cancer.

Progression-free survival is defined as the time from randomization to disease recurrence or death from any cause.

Data regarding patients with no evidence of recurrence or death were censored at the date of last follow-up.

Overall survival is defined as the time from Radical Hysterectomy to death from cervical cancer or last follow up.

## Background and Rationale

---

A recent international randomized trial and two large US retrospective studies have shown the inferiority of minimally invasive surgery vs the open approach in early cervical cancer in terms of DFS, OS and pattern of relapse. Previously, several retrospective studies including patients with early-stage cervical cancer had shown that laparoscopic radical hysterectomy was associated with less intraoperative blood loss, a shorter length of hospital stay, and a lower risk of postoperative complications than open abdominal radical hysterectomy. Furthermore, those studies found that minimally invasive approach obtained similar 5-year rates of disease-free survival or overall survival than the open approach with similar rates and patterns of recurrence.

In Europe, we have not carried out recently any relevant large study comparing the different forms of surgical treatment of early cervical cancer.

On the other hand, the design of any randomized clinical trial in the coming years on this subject will face severe difficulties to convince ethics committees after learning the results of the last clinical trial.

Therefore, we consider it crucial to carry out a highly controlled European retrospective study that allows us to draw sufficient conclusions to make adequate decisions in research on the surgical treatment of early cervical cancer.

A total of 54,517 new cases of cervical cancer cases and 24,874 deaths were reported in Europe in 2008 . Both incidence and mortality rates, are generally higher in Central and Eastern Europe and former Soviet Union countries than in Western Europe. The incidence rate of cervical cancer in Europe is 10.6 per 100,000. The analysis between different parts of Europe shows more than doubled incidence rates in Central/Eastern Europe (14.9/100,000) when compared with Western Europe (6.9/100,000). We have calculated that in Europe approximately over 3400 Radical Hysterectomies are performed annually if we considered a 6 % of surgical candidates.

Our goal is to obtain data from 1000 patients that underwent a Radical Hysterectomy in 2013 and 2014. Approximately 500 patients per arm.

### Scope of this study

---

- To take a real picture of what happened in Europe to those patients with IB1 cervical cancer that underwent a Radical Hysterectomy plus pelvic lymphadenectomy.
- Compare outcomes after MIS vs open technique.
- Study risk factors for relapse.
- Search for preventable maneuvers to lower relapse in the MIS group.

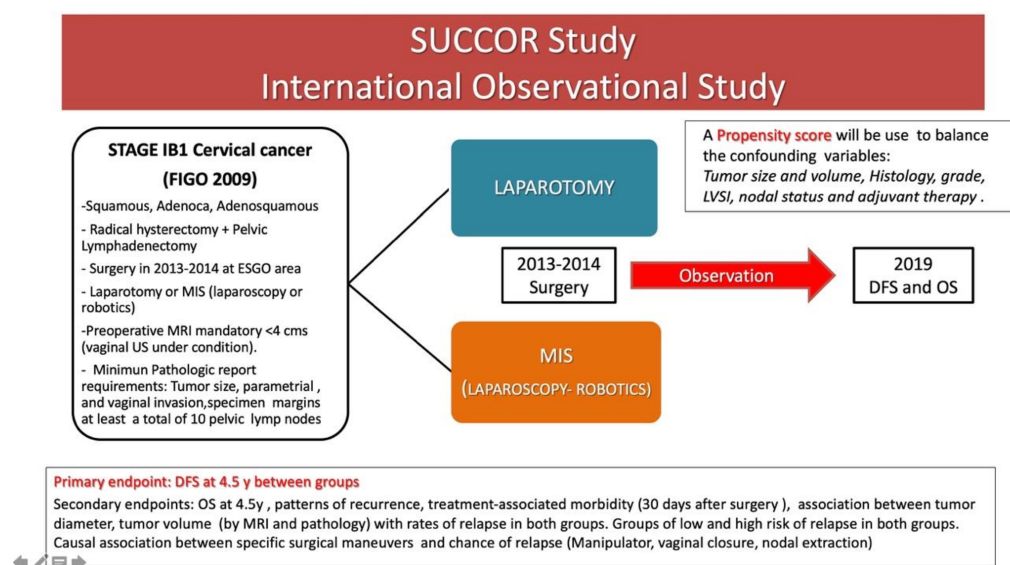

## Inclusion Criteria

1. Primary squamous cell carcinoma, adenocarcinoma, or adenosquamous carcinoma of the uterine cervix.
2. FIGO IB1 carcinoma (FIGO 2009)
3. Preoperative pelvic MRI indicating tumor diameter < 4 cm (at least two dimensions,) and no parametrial invasion. Exceptionally, it can be considered acceptable Vaginal Ultrasound, only if your Institution have internally validated this technique for cervical cancer. Otherwise, it cannot be accepted.
4. Preoperative either (Abdominal) CT scan or MRI or PET-CT ruling out extracervical metastatic disease
5. Performance status ECOG 0-1
6. Age 18 years or older
7. Type II-III radical hysterectomy or Type B-C by MIS (laparoscopic or robotic) or open surgery.
8. Operated during the years 2013-2014 within the ESGO area.
9. Bilateral pelvic lymphadenectomy or SNB plus bilateral pelvic lymphadenectomy. At least, a total of 10 pelvic nodes must be reported (considering both sides)

10. Pathologic report shows information on tumor size, vaginal and parametrial margins and bilateral nodal status.

### Exclusion Criteria

---

1. Any histological type other than adenocarcinoma, squamous cell carcinoma or adenosquamous carcinoma of the uterine cervix
2. Tumor size greater than 4 cm.
3. Past medical history of any invasive tumor
4. History of previous abdominal or pelvic radiotherapy of any type (including braquitherapy).
5. History of preoperative neoadjuvant chemotherapy cervical cancer .
6. Cervical conization previous to surgery.
7. Suspicious positive pelvic or paraaortic nodes nodes or metastatic disease on PET CT, MRI, or CT.
8. Any uterine diameter larger than 12 cm
9. Conversion from MIS to laparotomy
10. Pregnant women

### Study Development

---

1. Submission to ESGO members the study application form.
2. Confirmation of participants to join the study.
3. Accreditation of one Principal Investigator for each medical center and delivery of center codes.
4. Start collecting cases through Google Forms.
5. Deadline for collection of individual cases: Six months after the study release



## Screening for the candidate

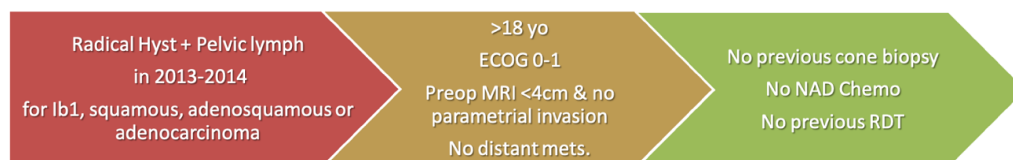

## How to participate in the study

1. Note that only centers belonging to the ESGO area can participate in the study. ([Appendix 1](#))
  2. Fill and sign the **online application form** (see the link below) to accept the participation in the study as principal investigator (PI) of your institution (only one PI by each institution) <https://forms.gle/2WPhzrkxyFPodmDg5> ([Appendix 2](#))
  3. As soon as your center joins the study, you will receive a Center Identification code and e-mail with instructions, allowing the data collection.
  4. Then, start to collect data of consecutive cervical cancer patients operated in 2013 and 2014 in your center that meet the inclusion and exclusion criteria.
  5. For collecting data, the online questionnaire can be reached in the following link: <https://forms.gle/bUpnV2r41fkv8cnY8> ([Appendix 3](#))
  6. Every time submit each a complete case form, you will receive an e-mail with the confirmation and a copy of your response. For sending the form, you have to fill at least the required items. You are allowed to re-edit your answers later.
1. We want to complete the data collection in less than six months.
  2. As principal investigator, I will be available for any doubt by e-mail (Ichiva@unav.es), or also by phone (+34630232947)

## Data statistical management

---

A Propensity score will be calculated to construct a weighted cohort of patients. For comparison of the distributions of categorical variables we will use the chi-square test in the unweighted cohort and weighted logistic-regression models in the weighted cohort. We will compare DFS and OS using the inverse probability of treatment-weighted log-rank test and plotted weighted survival functions. Estimation of the hazard ratio for death from any cause after minimally invasive radical hysterectomy, as compared with open surgery, with weighted Cox proportional-hazards models. Sensitivity analyses to assess the robustness of findings. To ensure that treatment-related survival differences were not confounded by a differential use of adjuvant therapy, the survival model will be refitted with postoperative treatment as a covariate.

To explore whether the observed association differed according to the minimally invasive method (traditional laparoscopy vs. robot-assisted laparoscopy), tumor size in the greatest dimension ( $\geq 2$  cm vs.  $< 2$  cm), or histologic type, we estimated the hazard ratios that were associated with minimally invasive surgery after refitting separate propensity-score-weighted survival models for each subgroup.

## Data Publication

---

Hopefully, the results of this study will be submitted for evaluation to international meetings and publication in a relevant international journal.

Authorship will include investigators following a strict criteria, considering the introduced number of cases in the study by each investigator. We will try to count with as many authors we may.

Furthermore, in order to count with as many authors as possible, we will create a Succor Research Study Group that will offer authorship when the investigators cannot may allocated among the first authors .

At the time of the publication we will follow the STROBE guidelines<sup>5</sup> for observational studies.

STROBE stands for an international, collaborative initiative of epidemiologists, methodologists, statisticians, researchers and journal editors involved in the conduct and dissemination of observational studies, with the common aim of STrengthening the Reporting of OBservational studies in Epidemiology.

### Study registration

---

- Succor Study has been registered at ClinicalTrials.gov. ClinicalTrials.gov

### References

---

1. Pecorelli, S. Revised FIGO staging for carcinoma of the vulva, cervix, and endometrium. *Int J Gynaecol Obstet* 105, 103-104 (2009)
2. Ramirez PT, Frumovitz M, Pareja R, et al Minimally invasive versus abdominal radical hysterectomy for cervical cancer. *N Engl J Med* 2018;379:1895-1904.
3. Melamed A, Margul DJ, Chen L, et al Survival after minimally invasive radical hysterectomy for early-stage cervical cancer. *N Engl J Med* 2018;379:1905-1914
4. Nancy A, Dreyer, Sean R et al. Why Observational Studies Should Be Among The Tools Used In Comparative Effectiveness Research. *Health Affairs* 29, 10 (2010): 1818–1825
5. von Elm E, Altman DG, Egger M, Pocock SJ, Gøtzsche PC, Vandenbroucke JP; STROBE Initiative. The Strengthening the Reporting of Observational Studies in Epidemiology (STROBE)statement: guidelines for reporting observational studies. *J Clin Epidemiol.* 2008 Apr;61(4):344-9.

### 10.Appendix 1. Countries of the ESGO area are allowed to participate in this study)

|            |         |
|------------|---------|
| Albania    | Andorra |
| Armenia    | Austria |
| Azerbaijan | Belarus |

|               |                        |
|---------------|------------------------|
| Belgium       | Bosnia and Herzegovina |
| Bulgaria      | Croatia                |
| Cyprus        | Czech Republic         |
| Denmark       | England                |
| Estonia       | Finland                |
| France        | Georgia                |
| Germany       | Greece                 |
| Hungary       | Iceland                |
| Ireland       | Israel                 |
| Italy         | Kazakhstan             |
| Kosovo        | Latvia                 |
| Liechtenstein | Lithuania              |
| Luxembourg    | Macedonia              |
| Malta         | Moldova                |
| Montenegro    | Netherlands            |
| Norway        | Poland                 |
| Portugal      | Romania                |
| Russia        | San Marino             |
| Serbia        | Slovakia               |
| Slovenia      | Spain                  |
| Sweden        | Switzerland            |
| Turkey        | Ukraine                |

## 11. Appendix 2. SUCCOR STUDY application form

**Application form for participation in this project as Principal Investigator (PI) in your institution**

SURGERY IN CERVICAL CANCER

AN EUROPEAN MULTICENTRIC OBSERVATIONAL STUDY

CASES OF 2013 and 2014

PI. Luis Chiva MD PhD, CLINICA UNIVERSIDAD DE NAVARRA

\* Required

**Email address \***

**First Name \***

**Last Name \***

**Position \***

*Mark only one oval.*

- Physician attending
- Fellow
- Resident
- Other:

**Country (only countries of the ESGO area are allowed to participate in this study) \***

*Mark only one oval.*

- Albania
- Andorra
- Armenia
- Austria
- Azerbaijan
- Belarus
- Belgium
- Bosnia and Herzegovina
- Bulgaria
- Croatia
- Cyprus
- Czech Republic
- Denmark
- England
- Estonia
- Finland
- France
- Georgia
- Germany
- Greece
- Hungary
- Iceland
- Ireland
- Israel
- Italy

- Kazakhstan
- Kosovo
- Latvia
- Liechtenstein
- Lithuania
- Luxembourg
- Macedonia
- Malta
- Moldova
- Montenegro
- Netherlands
- Norway
- Poland
- Portugal
- Romania
- Russia
- San Marino
- Serbia
- Slovakia
- Slovenia
- Spain
- Sweden
- Switzerland
- Turkey
- Ukraine

**Name of your institution/hospital/cancer center \***

**City \***

**Address \***

**Zip code \***

**Telephone number**

**Type of institution**

*Mark only one oval.*

- Academic public hospital
- Non Academic public hospital
- Academic private hospital
- Non Academic private hospital

**On average, How many early cervical cancer do you operate every year in your institution ?**

*Mark only one oval.*

- Less than 5
- 5-10
- 10-20
- 20-30
- >30

**Have your Department incorporated minimally invasive surgery for performing Radical Hysterectomy ? \***

*Mark only one oval.*

- Yes, many years ago, before 2014
- Yes, but recently, after 2014
- Not yet, we are still doing open surgery for cervical cancer

**Do you use typically Vaginal US as imaging tool of choice instead of MRI , for evaluating a surgical candidate for a radical hysterectomy ?**

Remember that Preoperative pelvic MRI indicating tumor diameter < 4 cm (at least two dimensions,) and no parametrial invasion is mandatory in this study . Exceptionally, it can be considered acceptable vaginal ultrasound, only if your Institution have internally validated this technique for cervical cancer. Otherwise, it cannot be accepted.

*Mark only one oval.*

- Yes
- No
- Other:

**If the previous answer was yes, Have you validated Vaginal US in your institution as an accurate option ?**

*Mark only one oval.*

- Yes
- No
- Other:

**Final Statement**

FINAL STATEMENT After having read the study protocol, I agree with the objectives and methodology of the study, and therefore I want to participate in the study as investigator of my Institution. I understand that I want to collaborate by providing the anonymized data of the questionnaire so the principal investigator cannot identify the patients. Through this document, I acquire the commitment that data that I send to the central investigator will match with those reflected in the clinical history of the patients. I also agree to consecutively include all the patients that meet the inclusion criteria of the study. It has been explained to me that after my inclusion as a researcher in the study, the principal investigator will assign a code to identify my institution. Each patient will be identified with that code followed by a correlative order number. Even though the study has been presented in the Ethical Committee of the central investigator, if necessary it might be presented in a local Ethical Committee. I count with the permission of my institution to participate in this study. I agree with everything previously affirmed.

**I wish to participate in Succor study \***

Signed (write down your name)

**Thank you very much for joining the SUCCOR STUDY, we will contact you shortly.**

**For any doubt or comment, feel free to contact Dr. Luis Chiva [lchiva@unav.es](mailto:lchiva@unav.es)**

(phone number +34630232947)



## 12. Appendix 3. Data Questionnaire

### SUCCOR STUDY, we want to know why

SURGERY IN CERVICAL CANCER

AN EUROPEAN MULTICENTRIC OBSERVATIONAL STUDY

CASES OF 2013 and 2014

PI. Luis Chiva MD PhD, CLINICA UNIVERSIDAD DE NAVARRA

\* Required

**Email address \***

**Local investigator Name \***

**Local investigator Last name \***

**Country \***

Only cases operated in the ESGO area can be included

*Mark only one oval.*

- Albania
- Andorra
- Armenia
- Austria
- Azerbaijan
- Belarus
- Belgium
- Bosnia and Herzegovina
- Bulgaria
- Croatia
- Cyprus
- Czech Republic
- Denmark
- England
- Estonia

- Finland
- France
- Georgia
- Germany
- Greece
- Hungary
- Iceland
- Ireland
- Israel
- Italy
- Kazakhstan
- Kosovo
- Latvia
- Liechtenstein
- Lithuania
- Luxembourg
- Macedonia
- Malta
- Moldova
- Montenegro
- Netherlands
- Norway
- Poland
- Portugal
- Romania
- Russia
- San Marino
- Serbia
- Slovakia
- Slovenia
- Spain
- Sweden

- Switzerland
- Turkey
- Ukraine
- Option 51

## Basic Data

---

### Center Code (provided by the central investigator) \*

#### Patient consecutive number of order \*

For instance, if the provided Center Code is: CUN (Clinica Universidad de Navarra); we will number patients as : CUN1, CUN2, CUN3, CUN4...etc.

#### Patient's Date of birth \*

*Example: December 15, 2012*

#### Date of the surgery (Radical Hysterectomy) \*

*Example: December 15, 2012*

## Inclusion criteria and Exclusion criteria

---

All the power of this study relies on the adequate fulfillment of these strict criteria to avoid confounding variables that may rest value to the conclusions. We have designed these criteria in a similar way to a prospective randomized trial. Please, try to be very meticulous with patient selection.

### Inclusion criteria

All the items must be checked to include the patient in the study

*Check all that apply.*

- Primary squamous cell carcinoma, adenocarcinoma, or adenosquamous carcinoma of the uterine cervix
- Stage IB1 carcinoma, <4 CMS, (FIGO 2009)

- Preoperative pelvic MRI indicating tumor diameter < 4 cm (at least two dimensions,) and no parametrial invasion. Exceptionally, it can be considered acceptable Vaginal Ultrasound, only if your Institution have internally validated this technique for cervical cancer. Otherwise, it cannot be accepted.
- Preoperative either (Abdominal) CT scan or MRI or PET-CT ruling out extracervical metastatic disease
- Performance status ECOG 0-1
- Age 18 years or older
- Radical hysterectomy Type II-III or Type B-C by MIS (laparoscopic or robotic) or open surgery.
- Patient was operated during the years 2013-2014 within the ESGO area.
- Bilateral pelvic lymphadenectomy (+- sentinel LN biopsy). At least, a total of 10 pelvic nodes must be reported (considering both sides)
- Pathologic report shows information on tumor size, vaginal and parametrial margins and nodal status

**Exclusion criteria**

All the items must be checked to include the patient in the study

*Check all that apply.*

- Any histological type other than adenocarcinoma, squamous cell carcinoma or adenosquamous carcinoma of the uterine cervix
- Tumor size greater than 4 cm.
- Past medical history of any invasive tumor
- History of previous abdominal or pelvic radiotherapy of any type (including braquithrapy).
- History of preoperative neoadjuvant chemotherapy cervical cancer .
- Cervical conization previous to surgery.
- Suspicious positive pelvic or paraaortic nodes nodes or metastatic disease on PET CT, MRI, or CT.

- Any uterine diameter larger than 12 cm
- Conversion from MIS to laparotomy
- Pregnant women

**Does the case fulfill all the inclusion and exclusion criteria? \***

This is a crucial item. Please try to be precise.

*Mark only one oval.*

- YES
- NO (patient will be excluded)

**Physical exam, biopsies and preoperative evaluation**

---

**BMI (kg/m<sup>2</sup>):****Performance status**

*Mark only one oval.*

- ECOG 0
- ECOG 1
- Not reported

**External appearance of the tumor**

*Mark only one oval.*

- Exophytic
- Endophytic ulcerative
- Endophytic barrel-shaped
- Not reported

**Estimated tumor size in mm by clinical evaluation in the chart**

(inspection and/or palpation; estimation of largest diameter in mm )

**Absence of vaginal or parametrial invasion during the pelvic exam**

*Mark only one oval.*

- No vaginal or parametrial invasion
- Vaginal or parametrial invasion (patient will be excluded)

**Histology of cervical biopsy:**

*Mark only one oval.*

- Squamous
- Adenocarcinoma
- Adenosquamous
- Not reported
- Other:

**Grade of the tumor on cervical biopsy**

*Mark only one oval.*

- Grade I or well differentiated
- Grade II or moderately differentiated
- Grade III or poorly differentiated
- Not reported

**Imaging evaluation**

Imaging information is crucial for this study. If any of the following items are not found in the radiologic report or they are not clear to you, please, we encourage the investigator to review the MRI images with the Radiology Department.

- Preoperative pelvic MRI is mandatory indicating tumor diameter < 4 cm (at least two dimensions, preferably three, to calculate volumes) and no parametrial invasion. This is the imaging tool of choice in this study.
- Exceptionally, if a pelvic MRI was not ordered, as second option, we considered acceptable vaginal Ultrasound indicating tumor diameter < 4 cm (at least two dimensions, preferably three to calculate volumes) with no parametrial invasion; only this is allowed if your Institution has internally validated this technique for cervical cancer. Otherwise, it cannot be accepted.

**Had the patient a pelvic MRI preoperatively ? \***

*Mark only one oval.*

- Yes
- No, but patient had vaginal US and we have validated this technique in cervical cancer.
- No (patient will be excluded)

**MRI (US) tumor diameter (1) in mm \***

Preferably MRI rather than US, if it was ordered

**MRI(US) tumor diameter (2) in mm \***

Preferably MRI rather than US, if it was ordered

**MRI (US) tumor diameter (3) in mm**

Preferably MRI rather than US, if it was ordered

**Parametrial invasion by MRI (US) \***

Preferably MRI rather than US, if it was ordered

*Mark only one oval.*

- Absence of parametrial invasion
- Presence of suspicious parametrial invasion (patient will be excluded)

**Extracervical disease by either abdominal CT or MRI or PET-CT \***

This a crucial item. Please try to be precise.

*Mark only one oval.*

- Absence of extracervical disease by CT or MRI or PET-CT:
- Presence of suspicious extracervical disease by CT or MRI or PET-CT, (patient will be excluded)

**Surgical procedure**

---

The operating report should be reviewed in detail to understand how was the operation carried out

**This Surgeon that performed the procedure can be described as**

*Mark only one oval.*

- Senior surgeon in gyn oncology (>10 years after gyn-onc training)
- Junior surgeon in gyn oncology (<10 years after gyn-onc training)
- Fellow in gyn oncology
- Resident assisted by senior or junior surgeon
- General gynecologist
- Other

**How was the surgical approach of this case ? \***

This a crucial item. Please try to be precise.

*Mark only one oval.*

- Open

- Laparoscopic
- Robotic
- Other (patient will be excluded)

**The operative report describes a radical hysterectomy with bilateral pelvic lymphadenectomy +- sentinel lymph node biopsy (SLNB) \***

To consider the procedure as Radical hysterectomy, the operating report must describe at least the following maneuvers: 1. Developing of pelvic spaces, 2. Ligature of uterine artery in its origin 3. Dissection of the ureter up to the bladder 4. Excision of the paracervical tissue 5. Bilateral pelvic lymph node dissection.

*Mark only one oval.*

- Yes
- No (patient will be excluded)

**What type of radical hysterectomy is described in the operating report?**

Type III or type C: transection of paracervix at junction with internal iliac vascular system

*Mark only one oval.*

- Type II or type B (Transection of paracervix at the ureter ; Modified radical hysterectomy).
- Type III or type C (Transection of paracervix at junction with internal iliac vascular system; Classical Radical Hysterectomy)
- Not reported
- Other:

**Type of nodal evaluation at the time of the procedure \***

Remember as inclusion criteria , at least, a total of 10 pelvic nodes must be reported (considering both sides)

*Mark only one oval.*

- Bilateral Pelvic lymphadenectomy (10 nodes, at least)
- SNB and Bilateral Pelvic lymphadenectomy (10 nodes at least)
- Other:

**Was the MIS (laparoscopy or robotics) converted to laparotomy in any moment of the procedure ?**

*Mark only one oval.*

- No



- Yes (patient will be excluded)
- Not applicable

**Duration of the procedure (min)****Estimated blood loss (cc):****Intraoperative complications**

*Check all that apply.*

- Intraoperative bleeding, patient needs transfusion during surgery
- Ureteral injury
- Bladder injury
- Vascular injury
- Bowel injury
- Nerve injury
- Other:

**Did the surgeon use any type of uterine manipulator?**

*Mark only one oval.*

- Yes
- No
- Not reported

**If the answer was yes, indicate which type****Did the surgeon report any of the following protective maneuvers during the procedure?**

*Check all that apply.*

- Extraction the lymph nodes in bag.
- Closure the vagina over the tumor at the beginning of the procedure to avoid contamination.
- Colpotomy performed vaginally at the end of procedure.
- Specimen extraction performed vaginally within a bag.
- Another protective maneuver to avoid tumor contamination (explain).
- Other:

## Pathological findings

---

Reporting pathological information is critical for the study. If any of the following items are not found in the Pathology Report, please, we encourage you to review the case with the Pathology Department. At least two diameters of the tumor must be reported, preferably three for evaluating tumor volume

### **Diameter (1) of the tumour (mm) \***

This a crucial item. Please try to be precise.

### **Diameter (2) of the tumour (mm) \***

This a crucial item. Please try to be precise.

### **Diameter (3) of the tumour (mm)**

### **Final histology in the Pathology report \***

This a crucial item. Please try to be precise. Mixed tumours are allowed if they shows these histological types.

*Mark only one oval.*

- Squamous carcinoma
- Adenocarcinoma
- Adenosquamous carcinoma
- Other (patient will be excluded, explain below)
- Other:

### **Final tumor grade**

This a crucial item. Please try to be precise.

*Mark only one oval.*

- Grade I or well differentiated
- Grade II or moderately differentiated
- Grade III or poorly differentiated
- Not reported

### **Lymphovascular space invasion**

This a crucial item. Please try to be precise.

*Mark only one oval.*

- Yes
- No
- Not reported

**Depth of invasion (measured from the cervical surface up to cervical canal)**

This a crucial item. Please try to be precise.

*Mark only one oval.*

- Superficial (invades  $<1/3$  of the stroma in any diameter)
- Intermediate (invades between  $1/3$  and  $2/3$  of the stroma in any diameter)
- Deep (invades  $>2/3$  of the stroma in any diameter)
- Not reported

**Parametrial invasion in the pathological specimen**

This a crucial item. Please try to be precise.

*Mark only one oval.*

- No parametrial invasion
- Unilateral proximal parametrial invasion
- Bilateral proximal parametrial invasion
- Not reported (It will be excluded)
- Other:

**Vaginal infiltration in the pathological specimen**

This a crucial item. Please try to be precise.

*Mark only one oval.*

- No vaginal infiltration
- Upper Vaginal infiltration
- Not reported
- Other:

**Infiltration of the uterine corpus**

*Mark only one oval.*

- Yes
- No
- Not reported

**Infiltration either of the tubes or ovaries**

*Mark only one oval.*

- Yes
- No
- Not reported

**Infiltration of pelvic peritoneum**

*Mark only one oval.*

- Yes
- No
- Not reported

**Margins on the final specimen \***

This a crucial item. Please try to be precise.

*Mark only one oval.*

- Free margins
- Positive margins
- Not reported (It will be excluded)

**If positive , specify which positive margin/s in detail:**

*Check all that apply.*

- Parametrial
- Vaginal
- Other:

**Nodal evaluation**

**Did the surgeon carried out a SLNB?**

*Mark only one oval.*

- Yes
- No
- Not reported

**If the answer was yes, what tracer use the surgeon to look for the sentinel node?**

*Check all that apply.*

- Blue dye
- Technetium
- Indocyanine green
- Not reported

- Other:

**if SLNB was done, did the surgeon identify a SLN?**

*Mark only one oval.*

- None
- Only one side
- Both sides
- Not reported

**Did the surgeon carried out bilateral pelvic lymphadenectomy? \***

*Mark only one oval.*

- Yes
- No
- Not reported

**Did the surgeon order a frozen section of one or more nodes?**

*Mark only one oval.*

- Yes
- No
- Not reported

**If the answer was yes, did the frozen section found any positive node ?**

*Mark only one oval.*

- Yes
- No
- Not reported

**If the answer was yes, how many nodes were found positive at the time of the frozen section ?**

**Total Number of pelvic nodes in the final pathology report \***

This a crucial item. Please try to be precise.

**Total Number of POSITIVE pelvic nodes in the final pathology report \***

This a crucial item. Please try to be precise.

Number of TOTAL/POSITIVE pelvic nodes in the final pathology report in each side

Check all that apply.

|     | Leftside<br>total | Left side<br>positive | Right side<br>total | Right side<br>positive |
|-----|-------------------|-----------------------|---------------------|------------------------|
| 0   |                   |                       |                     |                        |
| 1   |                   |                       |                     |                        |
| 2   |                   |                       |                     |                        |
| 3   |                   |                       |                     |                        |
| 4   |                   |                       |                     |                        |
| 5   |                   |                       |                     |                        |
| 6   |                   |                       |                     |                        |
| 7   |                   |                       |                     |                        |
| 8   |                   |                       |                     |                        |
| 9   |                   |                       |                     |                        |
| 10  |                   |                       |                     |                        |
| 11  |                   |                       |                     |                        |
| 12  |                   |                       |                     |                        |
| 13  |                   |                       |                     |                        |
| 14  |                   |                       |                     |                        |
| 15  |                   |                       |                     |                        |
| >15 |                   |                       |                     |                        |

Postoperative period

Postoperative complications (within 30 days after surgery) Several options allowed

Check all that apply.

- No relevant complications

- Post operative bleeding, patient needs transfusion
- Bladder fistula
- Ureteral fistula
- Urinary infection
- Hematuria
- Bladder dysfunction
- Urinary incontinence
- Small bowel fistula or leakage
- Large bowel fistula or leakage
- Constipation/ileus
- Bowel obstruction
- Pelvic or abdominal abscess
- DVT
- Pulmonary embolism
- Pneumonia
- Pleural effusion
- Lymphorrhagia
- Quilous ascites
- Abdominal wall infection of any type
- Moderate/Severe Vaginal bleeding
- Vaginal cuff cellulitis
- Vaginal cuff dehiscence
- Readmission to ICU
- Re-intervention
- Death
- Other:

**In case of readmission in ICU, re-operation or death within the 30 period after surgery, please summarise briefly the circumstances and the evolution.**

**Length of hospital stay (days)**

## Adjuvant therapy

---

### Did the patient received any adjuvant therapy after surgery? \*

This a crucial item. Please try to be precise.

Mark only one oval.

- Yes
- No
- Not reported

### If the answer was yes, when did she start the adjuvant therapy ?

*Example: December 15, 2012*

### If the answer was yes, which type of adjuvant therapy?

Check all that apply.

- Standard external radiation
- Braquiththerapy
- Radiation Boost as consolidation
- Concomitant chemotherapy as part of a chemoradiation protocol
- Chemotherapy before or after Radiation, but not concomitant
- Only adjuvant chemotherapy with out external radiation
- Radiation was suboptimal or incomplete
- Chemotherapy could not be completed as planned
- Other:

### If patient received external radiation, do you know the total dosis that receive the pelvic volume ?

The standard recommendation for postoperative radiation therapy consist sof external beam radiation therapy to a dose 50.4 Gy in 25-28 fractions using either intensity modulated radiation therapy or 4-field technique. The external beam radiation therapy maybe supplemented by vaginal brachytherapy boost at the discretion of the treating physician.

Mark only one oval.

- Less than 50.4 Gy
- Equal or greater than 50.4Gy



**If patient received "No concomitant" adjuvant chemotherapy, how many cycles did she receive?**

**Did the patient receive Bevacizumab as part of adjuvant therapy ?**

*Mark only one oval.*

- Yes
- No
- Not Reported

### **Follow up and Recurrences**

Accurate description of clinical details of relapse are very important for the conclusions of this study. In fact, central investigator will ask for a copy of patients' codified reports in case of relapse (MRI report, operating report and pathology report)

**Did the patient relapse during her follow up? \***

This a crucial item. Please try to be precise.

*Mark only one oval.*

- Yes
- No
- We don't know, patient was missed after surgery
- Other:

**if the answer was yes, when was she diagnosed the first relapse ?**

This a crucial item. Please try to be precise.

*Example: December 15, 2012*

**if the patient relapsed, Where was the recurrence?**

This a crucial item. Please try to be precise.

*Mark only one oval.*

- Local (including vagina, parametrial area and pelvic retroperitoneum)
- Distant metastases (any other location)
- Both Local and distance

**if the answer was yes, Where was specifically located the relapse?**

*Check all that apply.*

- Vaginal cuff, intracavitary
- Vaginal cuff, peritoneal side
- Parametria
- Lateral pelvic side wall
- Pelvic nodes
- Paraaortic nodes
- Pelvic Peritoneum
- Mid or upper abdominal peritoneum
- Inguinal nodes
- Laparotomy scar
- Trocar sites
- Distant metastases (specify where below in other )
- Other:

**How was diagnosed the recurrence?**

*Check all that apply.*

- Physical exam
- Vaginal cytology
- Biopsy
- Pelvic MRI
- CT scan
- PET CT
- Abdominal ultrasound
- Vaginal ultrasound
- Chest Xray
- Other:

**Any commentary to clarify the location of relapse/s**

**Date of last contact, last follow up or death \***

This a crucial item. Please try to be precise.

*Example: December 15, 2012*

### **Status at last follow-up \***

---

This a crucial item. Please try to be precise.

*Mark only one oval.*

- Alive without disease
- Alive with disease
- Death without disease
- Death of disease
- Missing

**Did the patient suffer any sequelae directly related to the surgical procedure at the time of the last follow-up?**

*Mark only one oval.*

- Yes
- No
- Not reported

**If the answer was yes, could you briefly describe the sequelae?**

### **Conclusion**

**Please, share any commentary regarding the case that may help to offer relevant information**

### **Final statement**

As a result of this I declare that all the information sent about this case coincides with that is contained in the clinical history, except for an error or unintentional omission.

*Mark only one oval.*

- Confirmed
- Unconfirmed

**Thank you very much for your invaluable collaboration.**

As soon as you submit you filled form, you will receive an e-mail with the confirmation and a copy of your response. For submitting the form that you have finished, it is expected to complete at least the required items. You have permission to re-edit your responses later. If you have any doubt, please do not hesitate to contact the central investigator at [Ichiva@unav.es](mailto:Ichiva@unav.es)

**To be filled by the central investigator**

**This Case includes all the requirements to be accepted**

*Mark only one oval.*

- YES
- NO

A copy of your responses will be emailed to the address you provided

## **13.Appendix 4. Succor study Final Declaration Form**

**Message From the Central PI**

- After the final submission of your cases, they will be thoroughly reviewed by our team, and if there is found any inconsistency, error or mistake, the record/s will be resent to you to for further evaluation.
- It has been an incredible honor and pleasure to count with you in this project. Thank you for your invaluable support.
- I dare to affirm that it is the one most extensive European studies ever done in Radical Hysterectomy.
- I hope that this initiative may help to understand better this disease and consequently to help our patients with cervical cancer.

**Investigator**

As you want to appear on the Certificate of Participation

2. First Name
3. Last Name
4. Institution

5. Center Code provided by central PI

6. Number of cases submitted to the study

2013-2014 with inclusion-exclusion criteria

7. Ethics Committee Approval

It is necessary to include the cases in the final publication

Mark only one oval.

It has been obtained and already submitted to the central PI

It has been already obtained and shortly it will be submitted to the central PI

It was requested and it will be send as soon as we get it

It has not been accepted by the Ethics Committee ( please, contact CENTRAL PI)

Other:

### Final Statement

---

As investigator in SUCCOR STUDY, I Declare that:

(Please check the different statements

Check all that apply.

- I have included all patients that underwent a Radical Hysterectomy in my Institution from January 1, 2013, to December 31, 2014 and fulfilled the study inclusion criteria.
- I only have submitted cases operated in this institution and not in other (to avoid duplicates)
- ALL the information submitted matches with the information contained in the records of the included patients.
- I have incorporated all the cases of RELAPSE or RECURRENCE and I have not missed any relapse.
- At the time of a final publication, I would like to collaborate as author, following the publication criteria included in the protocol.
- If due to the number of submitted cases I cannot be within the authorized number of authors of by the journal, I would like to appear in the publication as a member of the SUCCOR STUDY GROUP

9. Comments and Questions

10. Signed by
